# Supplementary material for: Association of Typical Toxic Heavy Metals with Schizophrenia
Source: PubMed Central journal article supplement (PMC6862006; doi:10.3390/ijerph16214200), 2019-10-30
Supplement: ijerph-16-04200-s001.pdf [file ijerph-16-04200-s001.pdf]

## Supplementary Materials

**Table S1.** Measured and standard concentrations of the certified reference materials.

| THMs | Measured Value <sup>a</sup><br>(ng/mL) | Standard Value <sup>b</sup><br>(ng/mL) | Reference<br>Type  | Coincidence<br>(%) |
|------|----------------------------------------|----------------------------------------|--------------------|--------------------|
| Cr   | 6.76 ± 0.13                            | 6.99 (5.24–8.74)                       | Serum <sup>c</sup> | 96.76              |
| Cd   | 4.95 ± 0.09                            | 4.92 (3.94–5.90)                       | Serum <sup>c</sup> | 100.59             |
| Pb   | 3.68 ± 0.03                            | 3.83 ± 0.18                            | Hair <sup>d</sup>  | 101.03             |
| As   | 19.90 ± 0.55                           | 19.70 (15.80–23.60)                    | Serum <sup>c</sup> | 95.98              |

<sup>a</sup> The measured value is the mean and standard deviation for three repeated measurements. <sup>b</sup> Standard values are provided by the company. <sup>c</sup> ClinChek® Serum Controls (trace elements level II, REF 8881, EVISA). <sup>d</sup> Human Hair Certified Reference Material (GBW09101b, China).

**Table S2.** Limit and precision of detection for four toxic heavy metals (THMs).

| THMs | Instrument<br>Detection Limit<br>(ng/mL) | Dilutio<br>n Factor | Method Detection<br>Limit<br>(ng/mL) | Repeatability<br>Rel. Repeat. SD <sup>#</sup> | Reproducibility<br>Rel. Repro. SD <sup>*</sup> |
|------|------------------------------------------|---------------------|--------------------------------------|-----------------------------------------------|------------------------------------------------|
| Cr   | 0.002                                    | 20                  | 0.04                                 | 1.86%                                         | 2.38%                                          |
| Cd   | 0.003                                    | 20                  | 0.06                                 | 1.88%                                         | 2.32%                                          |
| Pb   | 0.010                                    | 20                  | 0.20                                 | 0.89%                                         | 2.24%                                          |
| As   | 0.016                                    | 20                  | 0.32                                 | 2.77%                                         | 3.70%                                          |

<sup>#</sup> Relative repeatability standard deviation: calculated by extracting 3 measurements from same day. <sup>\*</sup> Relative reproducibility standard deviation: calculated by extracting 3 measurements from 3 different days.

**Table S3.** Main characteristics of included studies in the meta-analysis.

| No. | Author <sup>a</sup> | Drug <sup>b</sup> | Published year | Area    | Geographic area | Sample type | Sample size |         | THMs           | NOS score |
|-----|---------------------|-------------------|----------------|---------|-----------------|-------------|-------------|---------|----------------|-----------|
|     |                     |                   |                |         |                 |             | Case        | control |                |           |
| [1] | Guo et al.          | 1                 | 2013           | China   | Asia            | serum       | 119         | 126     | Cr, Cd, Pb, As | 9         |
| [2] | Arinola et al._1    | 0                 | 2010           | Nigeria | Africa          | plasma      | 15          | 20      | Cr, Cd, Pb     | 7         |
|     | Arinola et al._2    | 1                 | 2010           | Nigeria | Africa          | plasma      | 20          | 20      | Cr, Cd, Pb     | 7         |
| [3] | Cai et al._1        | 0                 | 2015           | China   | Asia            | serum       | 61          | 61      | Cr, Cd, Pb, As | 8         |
|     | Cai et al._2        | 0                 | 2015           | China   | Asia            | serum       | 50          | 49      | Cr, Cd, Pb, As | 8         |
| [4] | Li et al.           | 1                 | 2018           | China   | Asia            | serum       | 158         | 669     | Cr, As         | 8         |

|     |                       |   |      |         |        |       |    |    |                |   |
|-----|-----------------------|---|------|---------|--------|-------|----|----|----------------|---|
| [5] | P.C. Stanley et al._1 | 0 | 2002 | Nigeria | Africa | serum | 20 | 20 | Cd, Pb         | 6 |
|     | P.C. Stanley et al._2 | 1 | 2002 | Nigeria | Africa | serum | 20 | 20 | Cd, Pb         | 6 |
|     | P.C. Stanley et al._3 | 1 | 2002 | Nigeria | Africa | serum | 20 | 20 | Cd, Pb         | 6 |
| [6] | Present study         | 0 | -    | China   | Asia   | serum | 95 | 95 | Cr, Cd, Pb, As | 9 |

<sup>a</sup> Arinola et al.\_1 The schizophrenic patients were newly diagnosed and not taking antipsychotic drugs. Arinola et al.\_2 The schizophrenic patients had used antipsychotic drugs for at least 2 weeks. Cai et al.\_1 The case and control were from a training set. Cai et al.\_2 The case and control were from a test set. P.C. Stanley et al.\_1 The schizophrenic patients before the start of treatment. P.C. Stanley et al.\_2 The schizophrenic patients at 3 weeks after treatment. P.C. Stanley et al.\_3 The schizophrenic patients at 7 weeks after treatment. <sup>b</sup> 0: patients with schizophrenia were not treated with antipsychotic drugs. 1: patients with schizophrenia were treated with antipsychotic drugs.

**Table S4.** Results of meta-analysis of 4 THMs.

| THMs | Groups   | No. of studies | Sample size |         | Test of association |                | Test of heterogeneity |        |
|------|----------|----------------|-------------|---------|---------------------|----------------|-----------------------|--------|
|      |          |                | Case        | Control | SMD                 | 95%CI          | I <sup>2</sup>        | p      |
|      | Overall  | 5              | 518         | 1020    | 0.3246              | 0.0166–0.6326  | 83.0%                 | <0.01  |
| Cr   | Drug = 0 | 3              | 211         | 225     | 0.3134              | -0.2770–0.9038 | 88.2%                 | 0.7640 |
|      | Drug = 1 | 3              | 297         | 815     | 0.4063              | 0.2662–0.5464  | 0.0%                  |        |
| Cd   | Overall  | 6              | 538         | 1040    | -0.0357             | -0.4812–0.4098 | 92.6%                 | <0.01  |
|      | Drug = 0 | 4              | 241         | 245     | 0.2796              | -0.2488–0.8079 | 86.2%                 | 0.0978 |
|      | Drug = 1 | 4              | 317         | 835     | -0.3763             | -0.9452–0.1927 | 91.1%                 |        |
| Pb   | Overall  | 6              | 538         | 1040    | 0.2537              | -0.2108–0.7183 | 93.5%                 | <0.01  |
|      | Drug = 0 | 4              | 241         | 245     | 0.4064              | 0.1371–0.6757  | 47.9%                 | 0.3337 |
|      | Drug = 1 | 4              | 317         | 835     | 0.0240              | -0.7033–0.7512 | 95.0%                 |        |
| As   | Overall  | 4              | 483         | 1000    | 0.4459              | -1.1994–2.0912 | 99.4%                 | <0.01  |
|      | Drug = 0 | 2              | 206         | 205     | -0.1397             | -0.3889–0.1095 | 99.8%                 | 0.4560 |
|      | Drug = 1 | 2              | 277         | 795     | 1.2972              | -2.4727–5.0672 | 37.4%                 |        |

#### Reference

- Guo, J.; Zeng, J.; Yan, L.L.; Qiu, J.Y.; Feng, F.B.; Wang, J.Y. Quantitative detection and analysis of 41 kinds of trace elements in serum of patients with schizophrenia. *Clin J Med Offic.* **2013**, *41*, 44–26.
- Arinola, G., B.; Idonije, K.; Akinlade, and O. Ihenyen. Essential trace metals and heavy metals in newly diagnosed schizophrenic patients and those on anti-psychotic medication. *J Res Med Sci.* **2010**, *15*, 245–9.
- Cai, L., T.; Chen, J.; Yang, K.; Zhou, X.; Yan, W.; Chen, L.; Sun, L.; Li, S.; Qin, P.; Wang, et al. Serum trace element differences between Schizophrenia patients and controls in the Han Chinese population. *Sci Rep.* **2015**, *5*, 15013.
- Li, Z.; Liu, Y.M.; Li, X.; Ju, W. Wu, G.R.; Yang, X.M.; Fu, X.F. Gao, X.B. Association of Elements with Schizophrenia and Intervention of Selenium Supplements. *Biol Trace Elem Res.* **2018**, *183*, 16–21.

5. Stanley, P.C.; V.C. Wakwe. Toxic trace metals in the mentally ill patients. *Niger Postgrad Med J.* 2002. 9, 199–204.

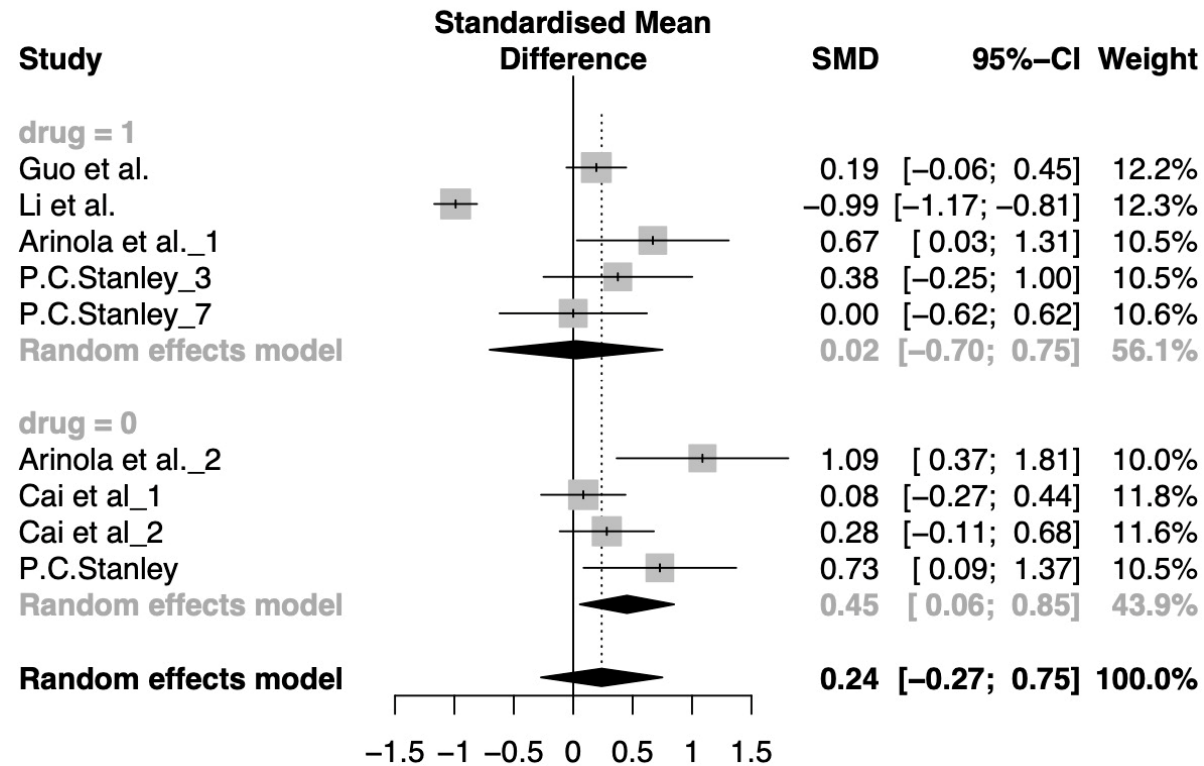

**Figure S1.** Forest plot of subgroup analysis stratified by whether the patients with schizophrenia treated with antipsychotic drugs (without present study). Overall pooled prevalence was calculated by random-effects module. Horizontal bars show 95% CIs. drug = 1, patients with schizophrenia were treated with antipsychotic drugs. drug = 0, patients with schizophrenia were not treated with antipsychotic drugs.

Cr

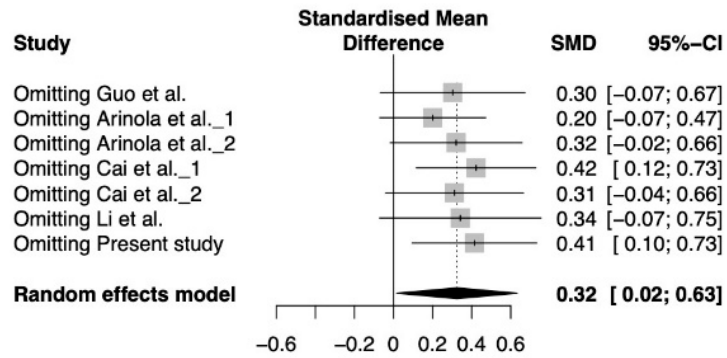

Cd

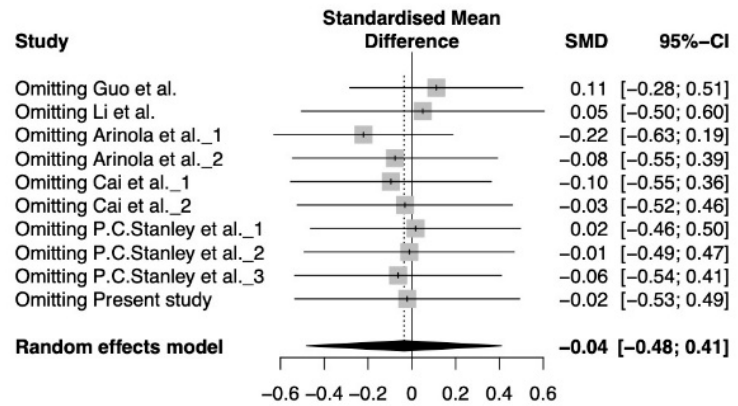

Pb

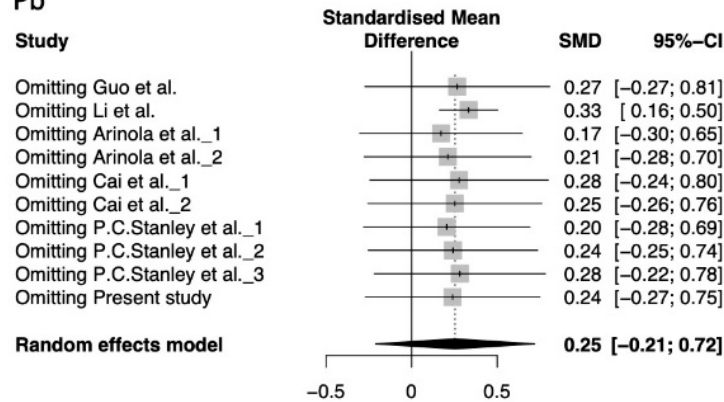

As

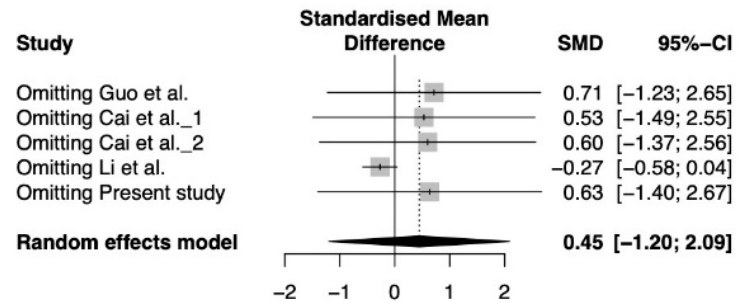

**Figure S2.** Sensitivity analysis through deletion of one study at a time to reflect the influence of the individual dataset to the pooled SMDs of the THM concentrations in patients with schizophrenia and healthy controls.
